# Supplementary material for: The green and sustainable synthesis of nanometer ZSM-5 without organotemplates via utilizing the recycled mother liquid
Source: Royal Society of Chemistry journal article supplement (doi:10.1039/d1nj01283e), 2021-01-01
Supplement: d1nj01283e1.pdf [file d1nj01283e1.pdf]

*Supporting Information for*

**A green and sustainable synthesis of nanometer ZSM-5  
without organotemplates via utilizing recycled mother  
liquid**

*Lukuan Zong, Hongxia Xu, Xiangyu Wang\*, Huijuan Wei\**

Green Catalysis Center, and College of Chemistry, Zhengzhou University, Zhengzhou

450001, P.R. China

\*Corresponding Author

H. Wei. Tel.: +86-15136179023, *E-mail: weihuijuan@zzu.edu.cn*

X. Wang. Tel.: +86-13526785218, *E-mail: wangxiangyu@zzu.edu.cn*

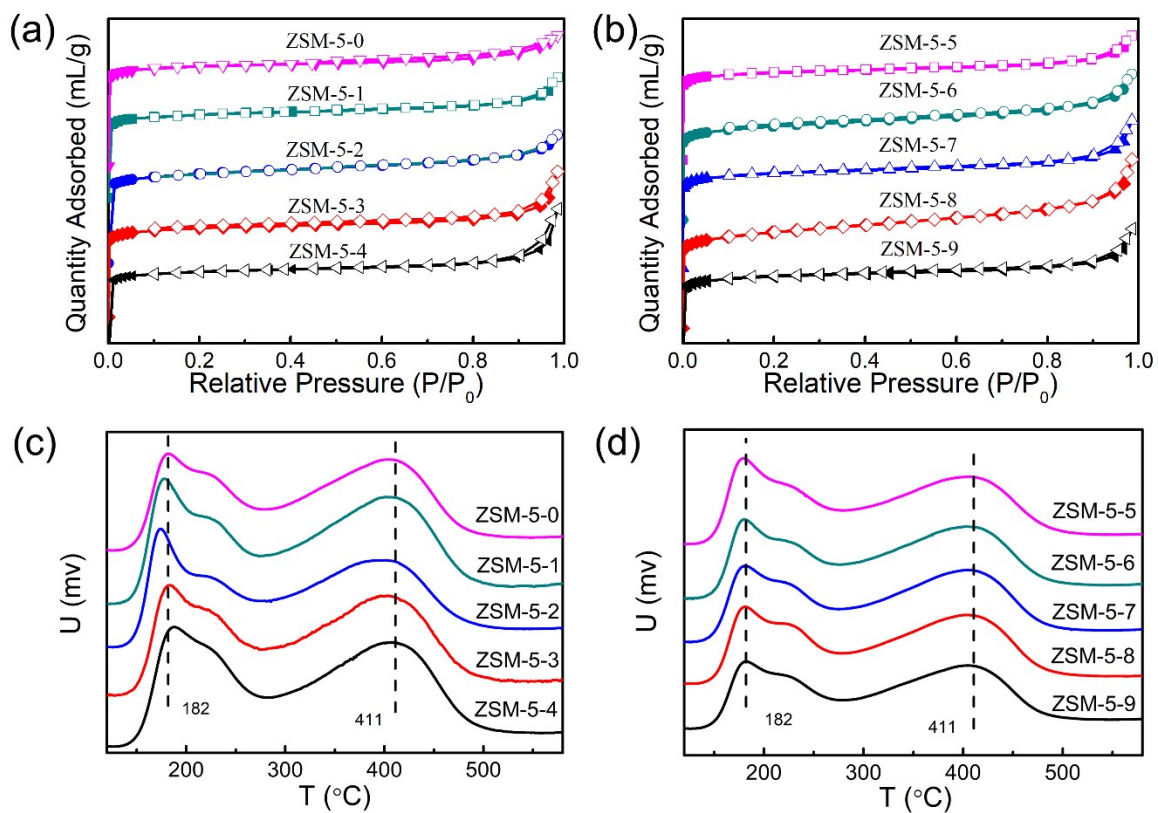

**Fig. S1** (a, b) N<sub>2</sub> adsorption and desorption isotherms, and (c, d) NH<sub>3</sub>-TPD curves of ZSM-5-0 and ZSM-5-n synthesized with recycled mother liquid.

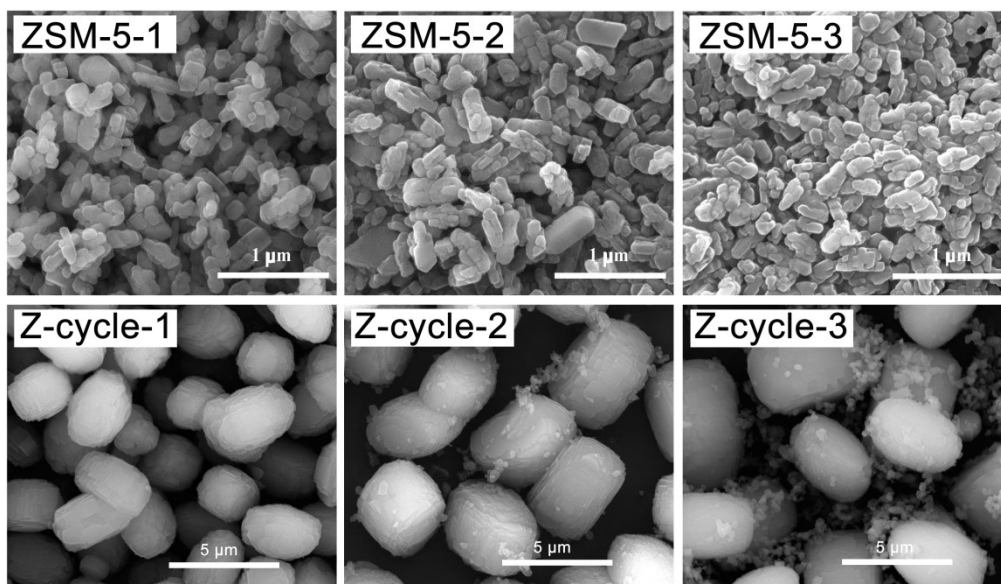

**Fig. S2.** ZSM-5 zeolites with self-made S-1 seeds were prepared via using recycled mother liquid compared with the samples without S-1 seeds added under the same conditions.

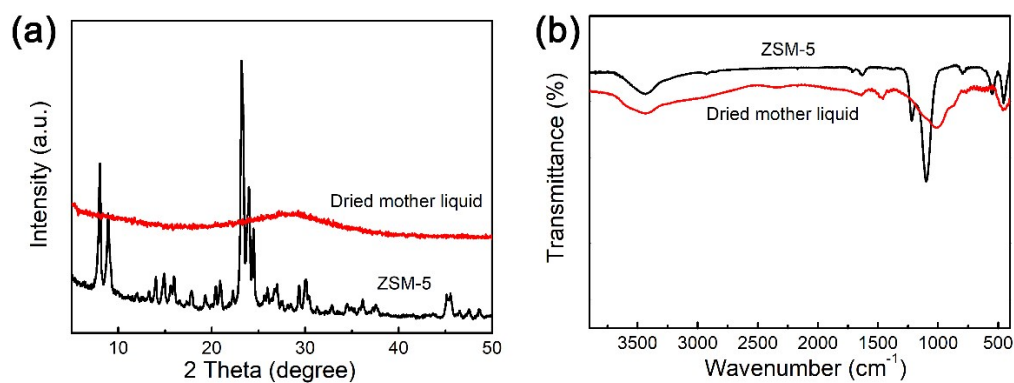

**Fig. S3.** (a) XRD patterns and (b) FT-IR spectra of ZSM-5 zeolites and dried mother liquid

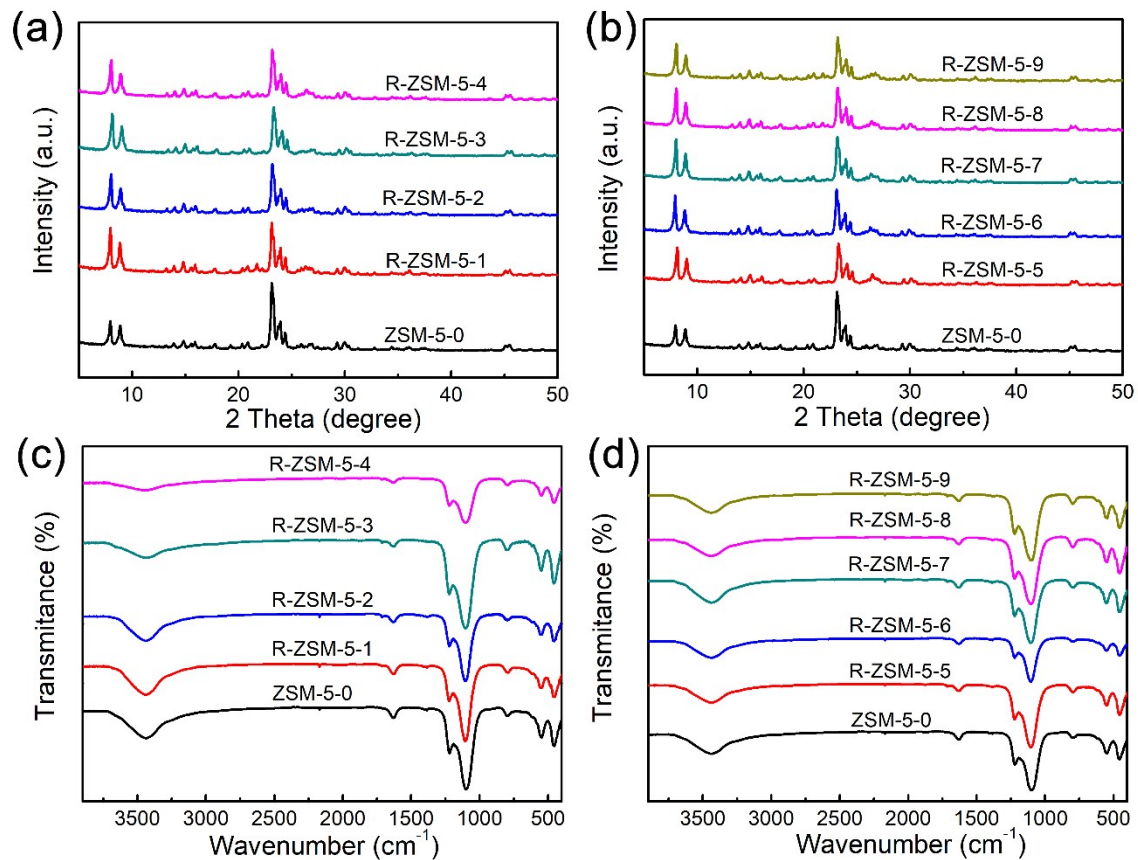

Fig. S4 (a, b) XRD patterns and (c, d) FT-IR spectra of ZSM-5 zeolites (R represents the sample after reaction)

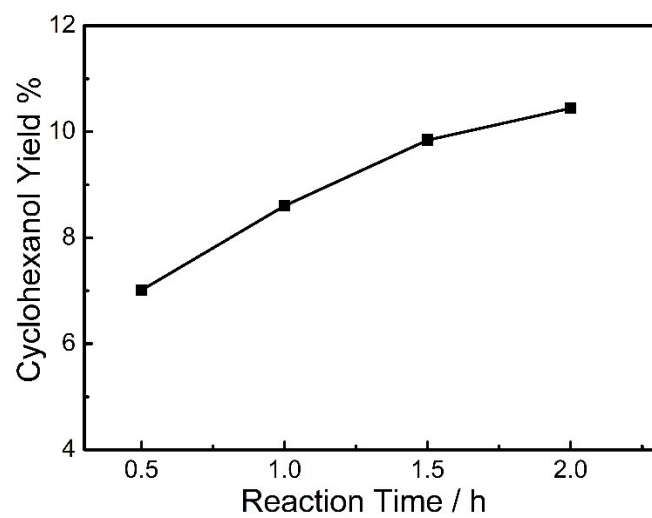

Fig. S5 Effect of different reaction time on the yield of cyclohexanol. (Catalyst: ZSM-5-0; reaction time: 0.5, 1.0, 1.5 and 2.0 h)
